# Supplementary material
Source: MDPI journal article supplement (https://www.mdpi.com/1424-2818/14/4/245)
Supplement: s1 [file s1 › diversity-1646303-supplementary.pdf]

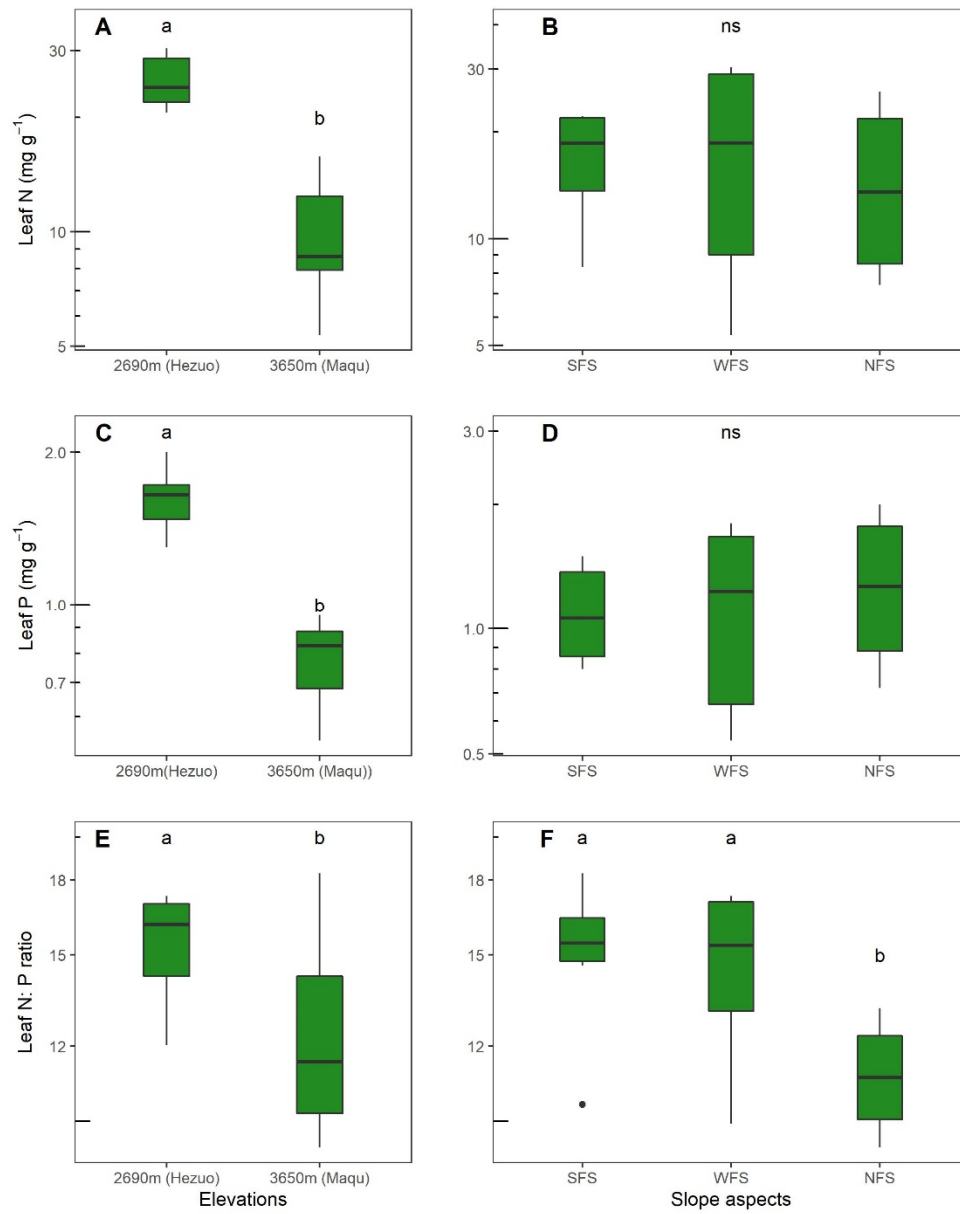

**Figure S1.** Comparisons of leaf [N] (A, B), [P] (C, D), and N: P ratio (E, F) between sites and among slope aspects, respectively, for the species *Anaphalis lacteal*. SFS, WFS, and NFS represent south-, west-, and north-facing slope aspects. Different letters represent significant differences at the level of  $P < 0.05$ . Variables are in log10-scale.

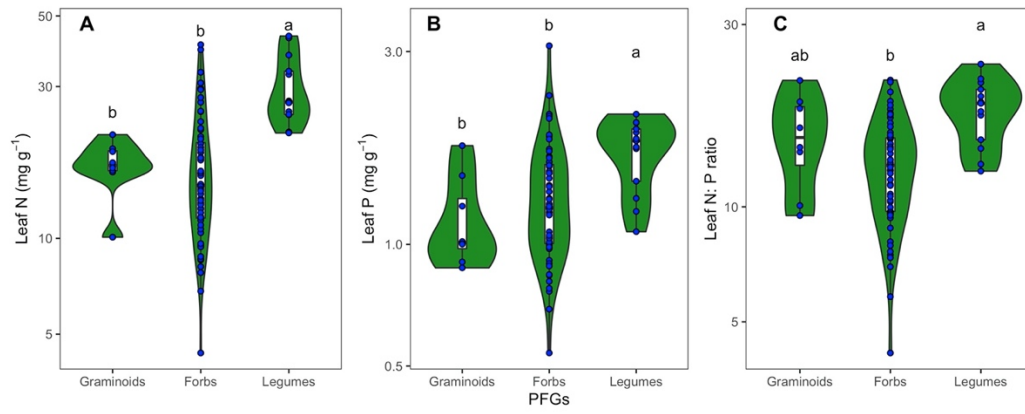

**Figure S2.** Comparisons of leaf [N] (Panel A), [P] (Panel B), and N: P ratio (Panel C) between different plant functional groups (PGs). Different letters represent significant differences at the level of  $P < 0.05$ . Variables are in log10-scale.
